# Supplementary material for: Viscosaline: new 3-alkyl pyridinium alkaloid from the Arctic sponge Haliclona viscosa
Source: Royal Society of Chemistry journal article supplement (doi:10.1039/b403413a), 2004-01-01
Supplement: b403413a.doc [file b403413a.doc]

Supporting Information

Viscosaline: New 3-Alkyl Pyridinium Alkaloid from the Arctic Sponge *Haliclona viscosa*

Christian A. Volk and Matthias Köck

The Supporting Information includes the complete 1D proton NMR spectra as well as the MS and the MS/MS spectra of viscosaline (**1**). Furthermore, a more detailed description of the structure elucidation is given.

The NMR spectra were obtained from 400 or 500 MHz NMR spectrometers at a temperature of 30°C.

**Figure SI-1:** 1D proton NMR spectrum of viscosaline (**1**) in DMSO-*d*6.

By comparison of the 1D proton spectrum shown here (Figure SI-1) with Figure 1 and Table 2 of the publication it becomes clear that the chemical shifts of the pyridine ring of viscoaline (**1**) are varying. This was observed for all investigated NMR samples of viscosaline (**1**).

A first guess for the structure of viscosaline (**1**) was that -alanine forms a complex with one pyridinium ring since one “pyridinium ring” showed . Two of the methylene groups are very broad in the 1D proton spectrum and were therefore preliminary assigned to the -alanine part. This assumption was not in accordance with the COSY data obtained in DMSO-*d*6 (correlations from NH2 to two CH2 groups) nor with the HMBC data since no correlation was observed from the alkyl chain to the pyridine nitrogen (N-22). Proton and carbon chemical shifts of the second ring (positions 20 to 26) are in accordance with a pyridine system. A clear differentiation between a pyridine and a pyridinium moiety is possible by comparison of (15N) of the heterocyclic nitrogen. The chemical shifts differ by approximately 100 ppm (pyridine ~320 ppm, pyridinium ~210 ppm). The broad methylene groups (DMSO-*d*6) were later identified to be the methylene groups adjacent to the amino function of the -alanine. The increased line width is due to an exchange process at the nitrogen atom. This exchange process is accelerated in MeOH-*d*4 and therefore the line width of these two signals are much smaller in comparison to DMSO-*d*6.

The two constitutional isomers I and II (see Figure 3) were distinguished by a TOCSY experi­ment. Using a mixing time of 250 ms it was possible to observe the correlations from H-7 to H-18 and H-19 (very weak at a mixing time of 200 ms).

The MS/MS studies were carried out with the molecular ion as parent ion.

**Figure SI-2:** ESI-MS spectrum of visocsaline (positive mode).

**Figure SI-3:** ESI-MS/MS spectrum of visocsaline (positive mode; parent ion: *m/z* = 608.5).
